# Supplementary material
Source: PubMed Central journal article supplement (PMC2174880)
Supplement: plntcell_tpc.107.053967_1.pdf [file plntcell_tpc.107.053967_1.pdf]

Supplemental Data. Chen et al. (2007). The central cell plays a critical role for pollen tube guidance in *Arabidopsis*.

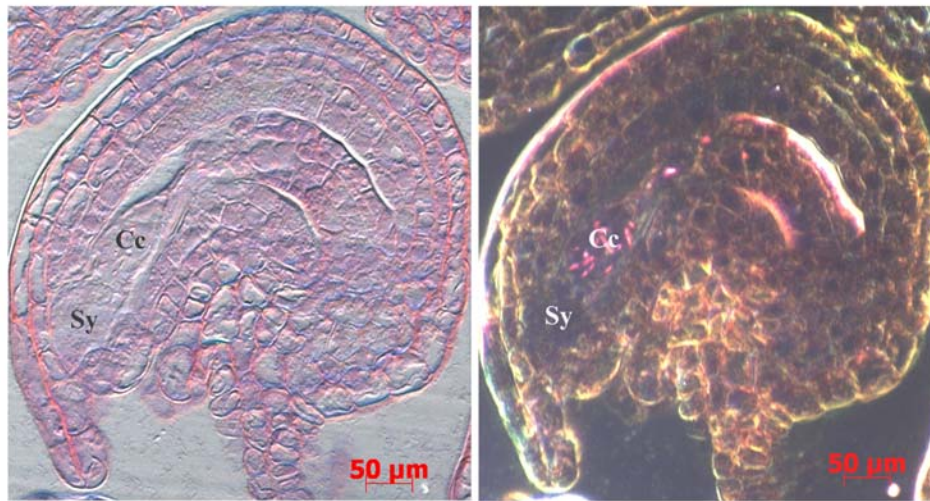

**Supplemental Figure 1. *GUS* reporter expression in central cell of the female gametophyte.**

(A) A Nomarski micrograph of 5μm thick section of a GUS stained ovule from *P<sub>CCG</sub>:GUS:3'T* transgenic plants showing the ovule structure; (B) The same section as in (A) viewed under dark field showing GUS signals (pink crystal) in central cell (Cc). No signal was detected in synergid cell (Sy). Bar=50μm.

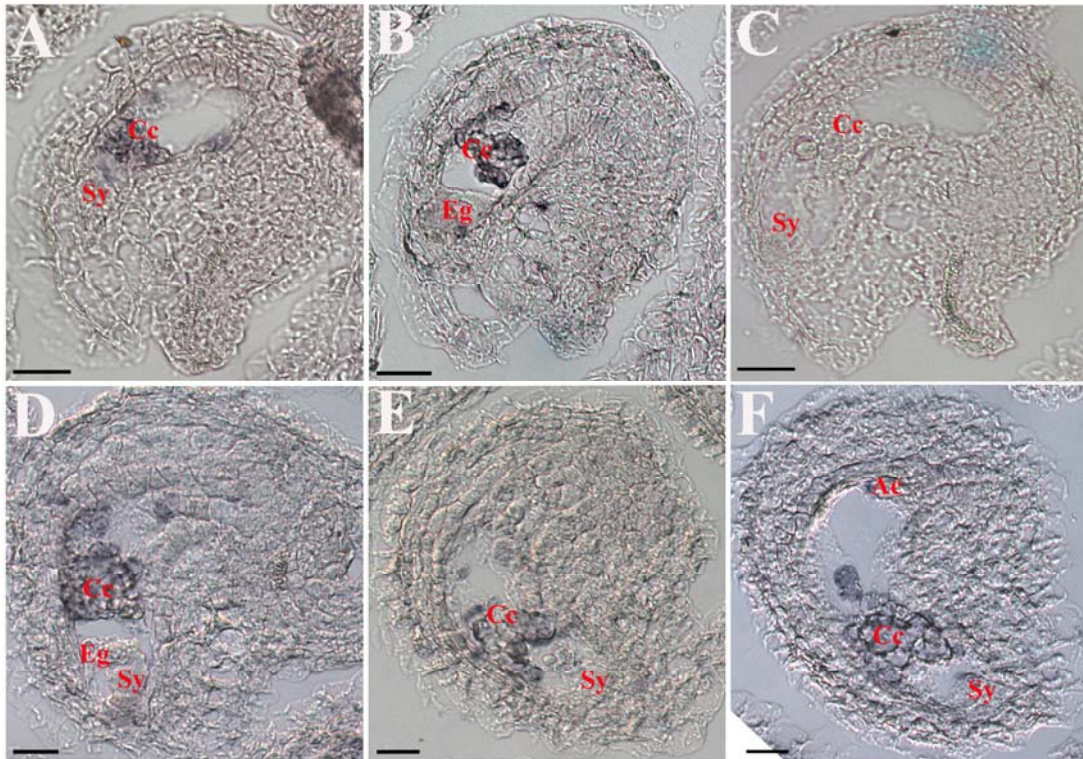

**Supplemental Figure 2. *CCG* expression in ovules revealed by RNA in situ hybridization.**

(A) A Nomarski micrograph showing positive hybridization signal (dark brown color) in central cell (Cc), no signal was found in synergid (Sy); (B) A Nomarski micrograph from the same ovule as in (A) showing hybridization signal in central cell (Cc), no signal in egg cell (Eg); (C) A Nomarski micrograph of a control section hybridized with *CCG* sense probe showing no hybridization signal in central cell (Cc) and synergid (Sy); (D) A micrograph showing *CCG* expression in central cell (Cc) and synergid (Sy); (E) A micrograph showing *CCG* expression in central cell (Cc), no signal in egg (Eg) and synergid (Sy); (E)-(F) Micrographs showing *CCG* expression in central cell (Cc), no signal in synergid (Sy), egg (Eg), or antipodal cell (Ac). Bar=20m in (A-C) and (E-F), bar=50 $\mu$ m in (D).

**Supplemental Table 1. Summary of complementation data.**

| <i>ccg/CCG</i> self                                     |          | 1.1:1                                                      | 57%                            |
|---------------------------------------------------------|----------|------------------------------------------------------------|--------------------------------|
| Transgenic line                                         | Line No. | Kan <sup>R</sup> to Kan <sup>S</sup> ratio of T2 seedlings | Seed set ratio (%) of T1 plant |
| <i>P<sub>CCG</sub>:CCG:3'T</i> Transgenic T1 lines      | 1        | 2.04 ( n=377 )                                             | 82.3 ( n=955 )                 |
|                                                         | 2        | 1.93 ( n=269 )                                             | 79.4 ( n=1021 )                |
|                                                         | 3        | 2.02 ( n=311 )                                             | 80.1 ( n=1134 )                |
|                                                         | 4        | 1.88 ( n=354 )                                             | 76.8 ( n=873 )                 |
|                                                         | 5        | 1.73 ( n=452 )                                             | 74.5 ( n=1073 )                |
| <i>35S:CCG-GFP</i> transgenic T1 lines                  | 1        | 1.81 ( n=613 )                                             | 74.5 ( n=1125 )                |
|                                                         | 2        | 1.72 ( n=549 )                                             | 73 ( n=1276 )                  |
|                                                         | 3        | 1.94 ( n=397 )                                             | 77.4 ( n=1018 )                |
| <i>P<sub>FIS2</sub>:CCG:3T</i> complementation T1 lines | 1        | 1.7 ( n=381 )                                              | 74 ( n=764 )                   |
|                                                         | 2        | 1.9 ( n=331 )                                              | 77 ( n=691 )                   |
|                                                         | 3        | 1.66 ( n=420 )                                             | 73 ( n=821 )                   |
